# Supplementary material for: Gamma-radiated biochar carbon for improved supercapacitor performance
Source: Royal Society of Chemistry journal article supplement (doi:10.1039/d0ra05764a), 2020-01-01
Supplement: d0ra05764a1.pdf [file d0ra05764a1.pdf]

### Supplementary information

#### Gamma-radiated biochar carbon for improved supercapacitor performance

Ezaldeen Adhamash <sup>a†</sup>, Rajesh Pathak <sup>a†</sup>, Qiquan Qiao <sup>a</sup>, Yue Zhou <sup>a\*</sup>, Robert McTaggart <sup>b\*</sup>  
a Department of Electrical Engineering and Computer Science, South Dakota State University,  
Brookings, SD 57007, USA  
b Department of Physics, South Dakota State University, Brookings, SD 57007, USA  
\*Email: [yue.zhou@sdstate.edu](mailto:yue.zhou@sdstate.edu)  
[robert.mctaggart@sdstate.edu](mailto:robert.mctaggart@sdstate.edu)

† These authors equally contributed to this work.

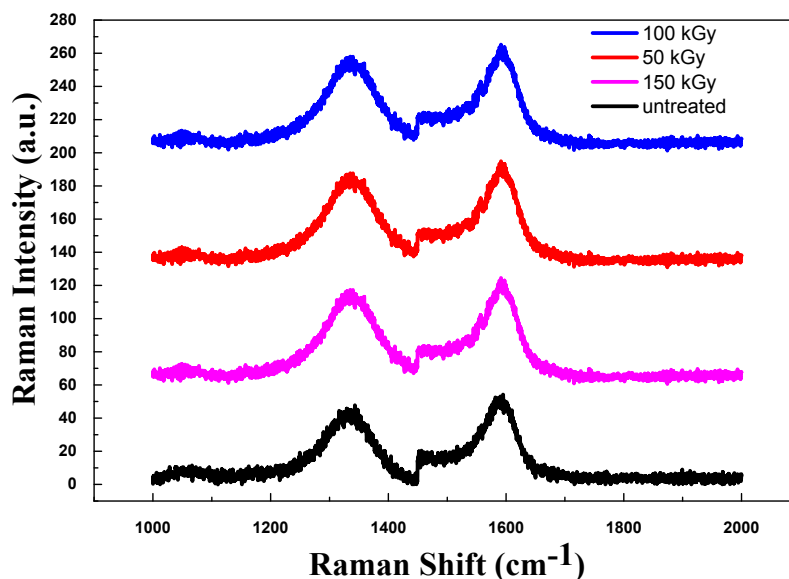

Fig. S1 Raman spectroscopy of untreated biochar, 50kGy, 100 kGy and 150 kGy of gamma radiation.

**Table S1 Values of energy densities with power densities with different current densities for untreated, 50 kGy, 100 kGy, and 150 kGy gamma radiation.**

|                              | untreated                             |                                      | 50 kGy gamma rays                     |                                      | 100 rays kGy gamma                    |                                      | 150 kGy gamma rays                    |                                      |
|------------------------------|---------------------------------------|--------------------------------------|---------------------------------------|--------------------------------------|---------------------------------------|--------------------------------------|---------------------------------------|--------------------------------------|
| Current (A g <sup>-1</sup> ) | Energy density (Wh kg <sup>-1</sup> ) | Power density (kW kg <sup>-1</sup> ) | Energy density (Wh kg <sup>-1</sup> ) | Power density (kW kg <sup>-1</sup> ) | Energy density (Wh kg <sup>-1</sup> ) | Power density (kW kg <sup>-1</sup> ) | Energy density (Wh kg <sup>-1</sup> ) | Power density (kW kg <sup>-1</sup> ) |
| 0.05                         | 16.01                                 | 0.12                                 | 28.3                                  | 0.101                                | 34.2                                  | 0.1                                  | 25.7                                  | 0.1                                  |
| 0.1                          | 15.5                                  | 0.26                                 | 26.4                                  | 0.204                                | 32.7                                  | 0.202                                | 25.1                                  | 0.207                                |
| 0.2                          | 15.4                                  | 0.6                                  | 25.6                                  | 0.422                                | 31.8                                  | 0.411                                | 24                                    | 0.425                                |
| 0.5                          | 14.8                                  | 2.2                                  | 24.2                                  | 1.13                                 | 30.6                                  | 1.06                                 | 22.4                                  | 1.18                                 |
| 1                            | 14.2                                  | 10.2                                 | 22.9                                  | 2.57                                 | 29.7                                  | 2.3                                  | 19.2                                  | 2.6                                  |
| 2                            | 13.6                                  | 16.3                                 | 21.5                                  | 7.03                                 | 28.8                                  | 5.5                                  | 17.5                                  | 8.04                                 |
| 5                            | 12.8                                  | 18                                   | 17.2                                  | 51                                   | 25.9                                  | 31.08                                | 15.8                                  | 11                                   |
| 10                           | 11.1                                  | 22                                   | 13.9                                  | 60                                   | 22.5                                  | 33                                   | 13.2                                  | 13                                   |

**Table S2 Comparison of our work with previous works**

| Precursor             | Method                | P (kW kg <sup>-1</sup> ) | E (Wh kg <sup>-1</sup> )      | References   |
|-----------------------|-----------------------|--------------------------|-------------------------------|--------------|
| Carbon YP-50          | Gamma dose 100 kGy    | 0.1                      | 34.2                          | Present work |
| Active carbon         | Gamma dose 5 KGy      | 0.236                    | 5.45                          | [1]          |
| Active carbon         | Gamma dose 20 kGy     | 0.047– 0.101             | 0.3 x 10 <sup>-3</sup> – 0.04 | [1]          |
| Carbon nanoparticles  | Flame synthesis       | 0.014                    | 4.8                           | [2]          |
| With MnO <sub>2</sub> |                       |                          |                               |              |
| Oil Palm Kernel       | Annealing at 500°C/4h | 0.3                      | 7.4                           | [3]          |
| Shell Biomass         |                       |                          |                               |              |

**Table S3 I<sub>D</sub>/I<sub>G</sub> ratios of untreated, 50 kGy, 100 kGy, and 150 kGy gamma radiation**

| Sample    | I <sub>D</sub> /I <sub>G</sub> |
|-----------|--------------------------------|
| untreated | 0.833                          |
| 50 kGy    | 0.839                          |
| 100 kGy   | 0.843                          |
| 150 kGy   | 0.839                          |

**Table S4 Specific capacitance, specific energy, and specific power with different current density for untreated, 50 kGy, 100 kGy, and 150 kGy gamma rays.**

| Current density (A g <sup>-1</sup> ) | Specific Capacitance (F g <sup>-1</sup> ) |             |              |              |
|--------------------------------------|-------------------------------------------|-------------|--------------|--------------|
|                                      | untreated                                 | 50 kGy dose | 100 kGy dose | 150 kGy dose |
| 0.05                                 | 115.3                                     | 203.6       | 246.2        | 185          |
| 0.1                                  | 111.8                                     | 190.3       | 235.5        | 180.9        |
| 0.2                                  | 110.8                                     | 184.1       | 229.3        | 173.2        |
| 0.5                                  | 106.5                                     | 174.5       | 220.2        | 161          |
| 1                                    | 102.4                                     | 165.3       | 214.2        | 138.0        |
| 2                                    | 98.15                                     | 154.6       | 207.2        | 126          |
| 5                                    | 92.5                                      | 123.7       | 186.8        | 114          |
| 10                                   | 80                                        | 100         | 162          | 95           |

**Table S5 Impedance results of untreated, 50 kGy, 100 kGy, and 150 kGy gamma rays.**

| Resistance      | untreated | 50 kGy | 100 kGy | 150 kGy |
|-----------------|-----------|--------|---------|---------|
| R <sub>CT</sub> | 21.7 Ω    | 13.6 Ω | 7.4 Ω   | 16.7 Ω  |
| R <sub>S</sub>  | 0.33 Ω    | 0.31 Ω | 0.30 Ω  | 0.32 Ω  |

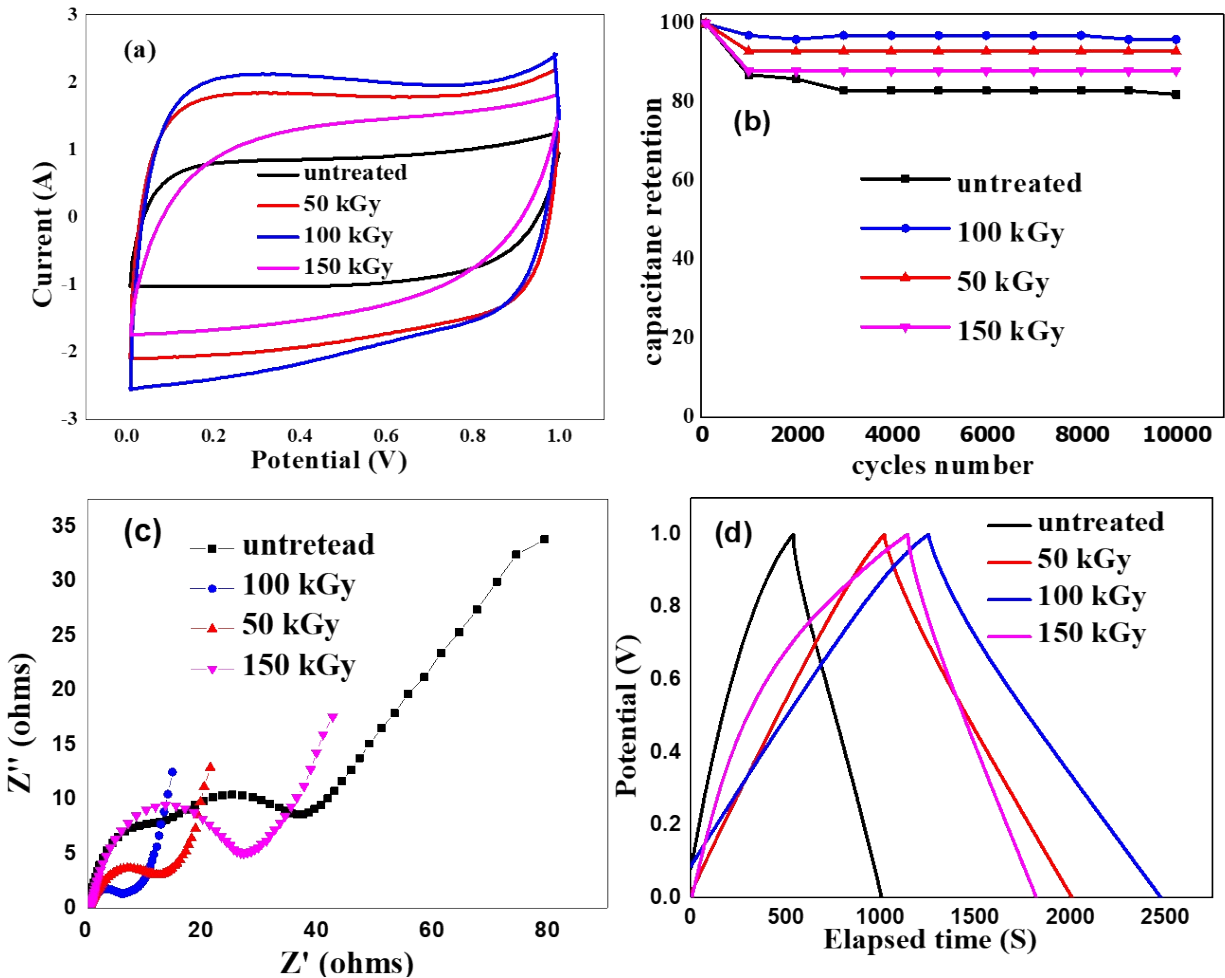

**Fig. S2.** The electrochemical properties of different carbon sample after 10,000 cycles. (a) CV curves of untreated and treated samples with gamma radiation, (b) capacitance retention versus cycles number at a current density of  $2 \text{ A g}^{-1}$ , (c) EIS curves of untreated and treated samples with gamma radiation (d) Galvanostatic charge-discharge curve of untreated and treated samples.

## References

1. Nor, N.S.M., et al., *Influence of gamma irradiation exposure on the performance of supercapacitor electrodes made from oil palm empty fruit bunches*. Energy, 2015. **79**: p. 183-194.
2. Yuan, L., et al., *Flexible solid-state supercapacitors based on carbon nanoparticles/MnO<sub>2</sub> nanorods hybrid structure*. ACS nano, 2012. **6**(1): p. 656-661.
3. Misnon, I.I., N.K.M. Zain, and R. Jose, *Conversion of oil palm kernel shell biomass to activated carbon for supercapacitor electrode application*. Waste and Biomass Valorization, 2019. **10**(6): p. 1731-1740.
